1 **Brief communication: Long-term absence of Langerhans cells alters the gene expression**  
2 **profile of keratinocytes and dendritic epidermal T cells**

3

4 Qingtai Su<sup>1</sup>, Aurélie Bouteau<sup>1,2</sup>, Jacob Cardenas<sup>3</sup>, Balaji Uthra<sup>3</sup>, Yuanyaun Wang<sup>3</sup>, Cynthia  
5 Smitherman<sup>3</sup>, Jinghua Gu<sup>3</sup> and Botond Z. Igyártó<sup>1,4\*</sup>

6 <sup>1</sup>*Baylor Scott & White Research Institute, Baylor Institute for Immunology Research, Dallas, TX*

7 <sup>2</sup>*Baylor University, Institute of Biomedical Studies, Waco, TX*

8 <sup>3</sup>*Baylor Scott & White Research Institute, Dallas, TX*

9 <sup>4</sup>*Thomas Jefferson University, Department of Microbiology and Immunology, Philadelphia, PA*

10

11

12

13

14 \*Address correspondence to: Botond Z. Igyártó

15 Email: [botond.igyarto@jefferson.edu](mailto:botond.igyarto@jefferson.edu)

16

17 **Short Title:** LCs affect epidermal homeostasis

18 **Keywords:** Langerhans cells, keratinocytes, dendritic epidermal T cells, gene expression

## 19 **ABSTRACT**

20 Tissue-resident and infiltrating immune cells are continuously exposed to molecules derived  
21 from the niche cells that often come in form of secreted factors, such as cytokines. These factors  
22 are known to impact the immune cells' biology. However, very little is known about whether the  
23 tissue resident immune cells in return also affect the local environment. In this study, with the  
24 help of RNA-sequencing, we show for the first time that long-term absence of epidermal resident  
25 Langerhans cells (LCs) led to significant gene expression changes in the local keratinocytes and  
26 resident dendritic epidermal T cells. Thus, immune cells might play an active role in maintaining  
27 tissue homeostasis, which should be taken in consideration at data interpretation.

## 28 **INTRODUCTION**

29 The effect of tissue environment on immune cells has been widely studied. Tissue  
30 microenvironment through an unknown mechanism is capable of shaping the chromatin  
31 landscapes of macrophages, which results in tissue-specific functions of macrophages(1). DC  
32 populations in different tissues display tissue-specific diversity and functions(2), and thus, it is  
33 anticipated that the close communication between DCs and the tissue microenvironment might  
34 endow them with functional diversity and plasticity. It is well documented that keratinocytes for  
35 example can regulate immune responses by affecting epidermal resident, antigen presenting  
36 Langerhans cells' biology through secretion of cytokines and other factors(3). Langerhans cells  
37 (LCs) are a subset of dendritic cells (DCs) that are radiation-resistant and reside in the epidermis,  
38 where they are tightly attached to the surrounding keratinocytes(4). LCs participate in promotion  
39 of self-tolerance, anti-fungal immunity, skin immunosurveillance, and protective humoral  
40 immune responses(5). In this study, we tested the idea whether long-term absence of an immune  
41 cell, LCs from the epithelial environment, affect the constituent KCs and the resident dendritic

42 epidermal T cells (DETCs). Here we show, to our knowledge, first-time evidence that long-term  
43 absence of an immune cell can lead to significant changes in the niche cells and to an altered  
44 tissue microenvironment.

## 45 **MATERIALS AND METHODS**

### 46 **Mice**

47 huLangerin-DTA ( $LC^{-/-}$ ) mice have been previously described(6). All experiments were  
48 performed with 8 weeks old littermate-controlled mice. Mice were housed in microisolator cages  
49 and fed autoclaved food. The Baylor Institutional Care and Use Committee approved all mouse  
50 protocols.

### 51 **Flow cytometry and cell sorting**

52 Single-cell suspensions of flank skin were obtained and stained as previously described(7). Cell  
53 suspensions were directly labeled with fluorochrome-conjugated antibodies for cell surface  
54 markers anti-MHC-II, anti-CD45 and fixable Viability Dye. KCs (MHC-II<sup>-</sup>, CD45<sup>-</sup>, live events)  
55 and DETCs (MHC-II<sup>+</sup>, CD45<sup>+</sup>, live events) were sorted on flow cytometer. Stringent doublets  
56 discrimination and live/dead gating were used to exclude possible contaminants and dead cells,  
57 respectively.

### 58 **RNA preparation**

59 Total RNA was isolated from cell lysates using the RNeasy Micro Kit (Qiagen) including on-  
60 column DNase digestion. Total RNA was analyzed for quantity and quality using the RNA 6000  
61 Pico Kit (Agilent).

### 62 **Sequencing Library Preparation**

63 Poly-A enriched NGS library construction was performed using the KAPA mRNA Hyper Prep  
64 Kit (KAPA Biosystems) using 50ng of input total RNA according to manufacturer's protocol  
65 using 16 amplification cycles. Quality of the individual libraries was assessed using the High  
66 Sensitivity DNA Kit (Agilent). Individual libraries were quantitated via qPCR using the KAPA  
67 Library Quantification Kit, Universal (KAPA Biosystems) and equimolar pooled. Final pooled  
68 libraries were sequenced on an Illumina NextSeq 500 with paired-end 75 base read lengths.

### 69 **Bioinformatics analysis**

70 Raw sequencing reads assessed for quality using FASTQC software(8). The adapters were  
71 trimmed and low-quality reads (< 20) were filtered using cutadapt(9). Reads were aligned to the  
72 mouse reference genome (GRCm38) using hisat2. Aligned SAM files were converted to BAM  
73 format using samtools(10) and featureCounts(11) was used to quantify total number of counts for  
74 each gene.

### 75 **RNA-seq analysis**

76 Transcripts with low expression, i.e., count-per-million (CPM) > 1 in less than two samples,  
77 were removed from downstream analysis, leaving 14,964 transcripts. Differential gene  
78 expression (DGE) analysis was performed using DESeq2(12) and comparisons were made  
79 between LC<sup>-/-</sup> and WT within DETC and KC cell populations.

### 80 **Pathway and Gene Ontology analysis**

81 Two approaches to pathway and Gene Ontology (GO) analysis were used(13). The Database for  
82 Annotation, Visualization and Integrated Discovery (DAVID)(14) was used for functional  
83 annotation of significantly regulated genes based on false discovery rate (FDR) < .05 and fold  
84 change (FC) cut-off of 1.5 for each comparison. Additionally, a fast implementation of pre-

85 ranked Gene Set Enrichment Analysis (FGSEA) using the fgsea R package(15,16) was  
86 performed on KEGG and GO gene sets obtained from the Molecular Signatures Database v6.2  
87 (MSigDB)(17).

## 88 **RNA-seq data visualization**

89 Counts were normalized using the median-of-ratios method(18) and log<sub>2</sub> transformed for data  
90 visualization. Principal component analysis (PCA) and hierarchical clustering were performed  
91 using the R. The transcripts of all heatmaps were hierarchically clustered using Euclidean  
92 distance and complete linkage function. Heatmaps were plotted using the NMF package(19),  
93 while PCA and volcano plots were made using ggplot2(20).

## 94 **RESULTS**

### 95 **Long-term absence of LCs leads to gene expression changes in KCs and DETCs**

96 To determine the possible effect of the absence of LCs on the cells of the epidermis, we took  
97 advantage of the huLangerin-DTA mice (hereafter LC<sup>-/-</sup>), which lack LCs starting from birth(6).  
98 Thus, for these mice, KCs and DETCs develop, differentiate, and function in the absence of  
99 mature LCs. Epidermal cells suspensions were generated from a cohort of LC<sup>-/-</sup> mice, along with  
100 littermate WT controls (**Figure 1a**). After staining with specific markers, the KCs and DETCs  
101 were sorted using flow cytometer, and RNA-sequencing performed. Unsupervised PCA of the  
102 expression data revealed that KCs and DETCs, which developed in the absence of LCs, clearly  
103 clustered away from their WT counterparts (**Figure 1b**). We identified 1220 up- and 537  
104 downregulated genes in KCs, while in DETCs, we identified 880 up- and 214 downregulated  
105 genes using a false discovery rate (FDR) <0.05 (**Figure 1c**). Out of the upregulated genes, 348  
106 (19.9%) were common between KCs and DETCs, while 22 genes (3.02%) were commonly

107 downregulated (**Figure 1c**). Next, we performed hierarchical clustering of differentially  
108 expressed genes with at least 2-fold change and plotted heatmaps to show the distinct patterns of  
109 up- and downregulated genes in KCs and DETCs (**Figure 1d**). We used color-coded volcano  
110 plots to better capture and visualize the common and cell specific changes in gene expression  
111 (**Figure 2a**). We observed that nerve growth factor (NGF) was highly upregulated in KCs and  
112 DETCs. NGF is part of the neurotrophin family and is involved in the differentiation and  
113 survival of neural cells(21), which suggest that LCs might directly or indirectly regulate nerve  
114 homeostasis in the epidermis.

115 *TSLP* was specifically upregulated in the KCs in the absence of LCs, which is in concordance  
116 with a recently published article by Lee et al.(22) TSLP is a known regulator of the Th2  
117 responses and it is also needed for mast cell homeostasis(23,24). Dysregulated TSLP production  
118 by KCs, in the absence of LCs, could have contributed to altered IgE levels(25) and increased  
119 mast cell numbers (unpublished observation on FVB background) observed in the LC<sup>-/-</sup> mice.  
120 The KCs, among others, showed downregulation of the MHC-II pathway genes H2-Eb1 (**Figure**  
121 **2a and b**), CD74 (invariant chain; also downregulated in DETCs;), and Cyp17a1, a member of  
122 the P450 cytochrome family involved in carcinogen metabolism(26,27).

### 123 **Lack of LCs might affect DETCs' biology and homeostasis**

124 We discovered that DETCs downregulated the Th17 pathway associated molecules, including  
125 *RORc* transcription factor, *IL-17RB* receptor, and *IL-17A* and *IL-17F* cytokines (**Figure 2a and**  
126 **b**). The IL-17 pathway plays an important role in the DETC's innate immune function to fight  
127 bacterial infections(28). More interestingly, we observed that DETCs showed lower expression  
128 of the  $\gamma/\delta$  TCRs (*Trdv4* and *Tcrg-V5*) and upregulation of TCR alpha chains (*Trav16* and  
129 *Trav13-4-dv7*). Transcription factors and other molecules that regulate the development,

130 differentiation, and homeostasis of DETCs, such as *Sox13*, *Blk*, and *Il-7r(29)*, were also  
131 downregulated. Thus, unlike previously published data(30), these data suggest that LCs might  
132 directly or indirectly regulate DETCs' biology and homeostasis, and could contribute to maintain  
133 their identity/fitness in the epidermis/periphery in the absence of the thymic environment.

#### 134 **The absence of LCs affected a variety of different cellular pathways in KCs and DETCs**

135 To gain a broader picture about the effect of the absence of LCs on KCs and DETCs, we  
136 performed KEGG pathway analysis on the expression data. We present data of significantly  
137 altered pathways using FDR < 0.05. We observed significant overlap of pathways upregulated by  
138 KCs and DETCs, but very minimal overlap of downregulated pathways (**Figure 2c**). The  
139 commonly upregulated pathways included different forms of cell adhesions (focal, adherent and  
140 tight)-, ribosome and RNA biogenesis-, autophagy-, bacterial invasion/infection-, MAPK- and  
141 ErbB signaling pathways (**Figure 2d**). Alterations in adhesion molecules and the ErbB signaling  
142 pathway in KCs, in the absence of LCs, were recently reported(22,31). The downregulated  
143 pathways showed considerably less overlap between these two cell types and included some of  
144 the amino acid degradation pathways (**Figure 2d**). KCs showed distinct dysregulation (mostly  
145 downregulation) of various metabolic pathways (sugar, protein, fatty acids, hormones, drug,  
146 xenobiotics etc.), while DETCs presented with alterations in TGF- $\beta$ -, Hippo-, oxidative  
147 phosphorylation-, citrate cycle-, lipid metabolism-, *Staphylococcus aureus* infection- etc.  
148 pathways (**Figure 2d**). Thus, these data suggest that LCs might have common and cell-specific  
149 effects on KCs' and DETCs' biology.

#### 150 **DISCUSSION**

151 Here we bring experimental evidence that long-term absence of LCs leads to gene expression  
152 changes in KCs and DETCs. The significant changes discovered by pathway analysis also

153 suggest that KCs' and DETCs' biology and hemostasis are likely affected. Further studies are  
154 needed to confirm the observed changes and their consequences. It will also be important to  
155 determine which LC-derived factors play role in the epidermal homeostasis. Our preliminary  
156 IPA Upstream Regulator Analysis identified a list of potential regulators, including cytokines,  
157 growth factors, and enzymes (data not shown), known or anticipated to be produced by LCs.  
158 To our knowledge we show for the first time that long-term absence of an immune cell can lead  
159 to significant changes in the niche cells and to altered tissue environment. The effect of niche  
160 cells on resident immune cells is very much appreciated by the immunologist, however, our  
161 findings support the idea that the resident immune cells are not mere passive receivers, but rather  
162 play an active and indispensable role in maintaining tissue homeostasis. Thus, studies using  
163 constitutive immune-cell knockouts, including  $LC^{-/-}$  mice, in which the immunological changes  
164 and outcomes were directly attributed to the absence of a specific immune cell, might have to be  
165 reassessed(5,6,32–34).

## 166 **FIGURE LEGENDS**

167 **Figure 1. Absence of LCs leads to gene expression changes in KCs and DETCs. a.**  
168 Experimental flow. KCs and DETCs were flow sorted from LC-deficient ( $LC^{-/-}$ ) and littermate  
169 WT controls and RNA-seq. performed. The resulting data were then subjected to bioinformatic  
170 analyses. **b.** Principal component analysis of the RNA-seq. data. Each dot represents a separate  
171 animal. **c.** The overlaps between the genes that were up- (top) or downregulated (bottom) in the  
172 absence of LCs in KCs and DETCs are presented in forms of Venn diagrams;  $FDR < 0.05$ . **d.**  
173 Heatmap presentation of the genes that showed two-fold changes between  $LC^{-/-}$  and WT mice.  
174 KCs (left) and DETC (right).  $FDR < 0.05$ .



175 **Figure 2. LCs have common and cell specific effects on KCs' and DETCs' biology. a.**

176 Common and cell specific gene expression changes are presented in form of color-coded volcano  
177 plots. KCs (left) and DETCs (right). **b.** Flow cytometry confirmation of the RNA-seq. data on  
178 protein levels. Each dot represents a separate mouse. Two tailed Student's t-test. \* $p < 0.05$ ,  
179 \*\*\* $p < 0.001$ . **c.** The overlap between up- or downregulated regulated KEGG pathways in KCs  
180 and DETCs from  $LC^{-/-}$  mice are presented in forms of Venn diagrams. **d.** Selected KEGG  
181 pathways altered in KCs and DETCs in the absence of LCs are depicted based on normalized  
182 enrichment scores (NES).  $FDR < 0.05$ .

183 **ACKNOWLEDGEMENTS**

184 We thank the animal facility, flow core and genomics core for their help and support. The Baylor  
185 Scott & White Health Foundation supported this work.

186 **REFERENCES**

- 187 1. Lavin Y, Winter D, Blecher-Gonen R, David E, Keren-Shaul H, Merad M, et al. Tissue-  
188 Resident Macrophage Enhancer Landscapes Are Shaped by the Local Microenvironment.  
189 Cell. 2014 Dec;159(6):1312–26.
- 190 2. Pakalniškytė D, Schraml BU. Tissue-Specific Diversity and Functions of Conventional  
191 Dendritic Cells. In: Advances in Immunology. 2017.
- 192 3. Clayton K, Vallejo AF, Davies J, Sirvent S, Polak ME. Langerhans cells-programmed by  
193 the epidermis. Frontiers in Immunology. 2017.
- 194 4. Romani N, Holzmann S, Tripp CH, Koch F, Stoitzner P. Langerhans cells - dendritic cells  
195 of the epidermis. APMIS. 2003 Jul;111(7–8):725–40.
- 196 5. Kaplan DH. Ontogeny and function of murine epidermal Langerhans cells. Nat Immunol.

- 197 2017 Sep;18(10):1068–75.
- 198 6. Kaplan DH, Jenison MC, Saeland S, Shlomchik WD, Shlomchik MJ. Epidermal  
199 langerhans cell-deficient mice develop enhanced contact hypersensitivity. *Immunity*. 2005  
200 Dec;23(6):611–20.
- 201 7. Yao C, Zurawski SM, Jarrett ES, Chicoine B, Crabtree J, Peterson EJ, et al. Skin dendritic  
202 cells induce follicular helper T cells and protective humoral immune responses. *J Allergy*  
203 *Clin Immunol*. 2015 May;
- 204 8. Andrews S. FASTQC A Quality Control tool for High Throughput Sequence Data.  
205 Babraham Inst. 2015;
- 206 9. Martin M. Cutadapt removes adapter sequences from high-throughput sequencing reads.  
207 *EMBnet.journal*. 2011;
- 208 10. Li H, Handsaker B, Wysoker A, Fennell T, Ruan J, Homer N, et al. The Sequence  
209 Alignment/Map format and SAMtools. *Bioinformatics*. 2009;
- 210 11. Liao Y, Smyth GK, Shi W. FeatureCounts: An efficient general purpose program for  
211 assigning sequence reads to genomic features. *Bioinformatics*. 2014;
- 212 12. Love MI, Huber W, Anders S. Moderated estimation of fold change and dispersion for  
213 RNA-seq data with DESeq2. *Genome Biol*. 2014;
- 214 13. Ashburner M, Ball CA, Blake JA, Botstein D, Butler H, Cherry JM, et al. Gene ontology:  
215 Tool for the unification of biology. *Nature Genetics*. 2000.
- 216 14. Huang DW, Sherman BT, Lempicki RA. Systematic and integrative analysis of large gene  
217 lists using DAVID bioinformatics resources. *Nat Protoc*. 2009;

- 218 15. Sergushichev AA. An algorithm for fast preranked gene set enrichment analysis using  
219 cumulative statistic calculation. *bioRxiv*. 2016;
- 220 16. Subramanian A, Tamayo P, Mootha VK, Mukherjee S, Ebert BL, Gillette MA, et al. Gene  
221 set enrichment analysis: A knowledge-based approach for interpreting genome-wide  
222 expression profiles. *Proc Natl Acad Sci U S A*. 2005;
- 223 17. Liberzon A, Subramanian A, Pinchback R, Thorvaldsdóttir H, Tamayo P, Mesirov JP.  
224 Molecular signatures database (MSigDB) 3.0. *Bioinformatics*. 2011;
- 225 18. Anders S, Huber W. Differential expression analysis for sequence count data. *Genome*  
226 *Biol*. 2010;
- 227 19. Gaujoux R, Seoighe C. A flexible R package for nonnegative matrix factorization. *BMC*  
228 *Bioinformatics*. 2010;
- 229 20. Ginestet C. *ggplot2: Elegant Graphics for Data Analysis*. *J R Stat Soc Ser A (Statistics*  
230 *Soc*. 2011;
- 231 21. Skaper SD. Nerve growth factor: a neuroimmune crosstalk mediator for all seasons.  
232 *Immunology*. 2017.
- 233 22. Lee HJ, Kim TG, Kim SH, Park JY, Lee M, Lee JW, et al. Epidermal Barrier Function Is  
234 Impaired in Langerhans Cell-Depleted Mice. *J Invest Dermatol*. 2019;
- 235 23. Han NR, Oh HA, Nam SY, Moon PD, Kim DW, Kim HM, et al. TSLP induces mast cell  
236 development and aggravates allergic reactions through the activation of MDM2 and  
237 STAT6. *J Invest Dermatol*. 2014;
- 238 24. Leyva-Castillo JM, Hener P, Michea P, Karasuyama H, Chan S, Soumelis V, et al. Skin  
239 thymic stromal lymphopoietin initiates Th2 responses through an orchestrated immune

- 240 cascade. *Nat Commun.* 2013;
- 241 25. Nakajima S, Igyártó BZ, Honda T, Egawa G, Otsuka A, Hara-Chikuma M, et al.  
242 Langerhans cells are critical in epicutaneous sensitization with protein antigen via thymic  
243 stromal lymphopoietin receptor signaling. *J Allergy Clin Immunol.* 2012  
244 Apr;129(4):1048--55.e6.
- 245 26. Lewis JM, Bürgler CD, Freudzon M, Golubets K, Gibson JF, Filler RB, et al. Langerhans  
246 Cells Facilitate UVB-Induced Epidermal Carcinogenesis. *J Invest Dermatol.* 2015;
- 247 27. Modi BG, Neustadter J, Binda E, Lewis J, Filler RB, Roberts SJ, et al. Langerhans cells  
248 facilitate epithelial DNA damage and squamous cell carcinoma. *Science* (80- ). 2012;
- 249 28. Cho JS, Pietras EM, Garcia NC, Ramos RI, Farzam DM, Monroe HR, et al. IL-17 is  
250 essential for host defense against cutaneous *Staphylococcus aureus* infection in mice. *J*  
251 *Clin Invest.* 2010;
- 252 29. Kang J, Malhotra N. Transcription Factor Networks Directing the Development, Function,  
253 and Evolution of Innate Lymphoid Effectors. *Annu Rev Immunol.* 2015;
- 254 30. Taveirne S, De Colvenaer V, Van Den Broeck T, Van Ammel E, Bennett CL, Taghon T,  
255 et al. Langerhans cells are not required for epidermal V $\beta$ 3 T cell homeostasis and function.  
256 *J Leukoc Biol.* 2011;
- 257 31. Shipman WD, Chyou S, Ramanathan A, Izmirly PM, Sharma S, Pannellini T, et al. A  
258 protective Langerhans cell keratinocyte axis that is dysfunctional in photosensitivity. *Sci*  
259 *Transl Med.* 2018;
- 260 32. Igyártó BZ, Haley K, Ortner D, Bobr A, Gerami-Nejad M, Edelson BT, et al. Skin-  
261 resident murine dendritic cell subsets promote distinct and opposing antigen-specific T

- 262 helper cell responses. *Immunity*. 2011 Aug;35(2):260–72.
- 263 33. Igyártó BZ, Jenison MC, Dudda JC, Roers A, Müller W, Koni PA, et al. Langerhans cells  
264 suppress contact hypersensitivity responses via cognate CD4 interaction and langerhans  
265 cell-derived IL-10. *J Immunol*. 2009 Oct;183(8):5085–93.
- 266 34. Obhrai JS, Oberbarnscheidt M, Zhang N, Mueller DL, Shlomchik WD, Lakkis FG, et al.  
267 Langerhans cells are not required for efficient skin graft rejection. *J Invest Dermatol*.  
268 2008;
- 269

a

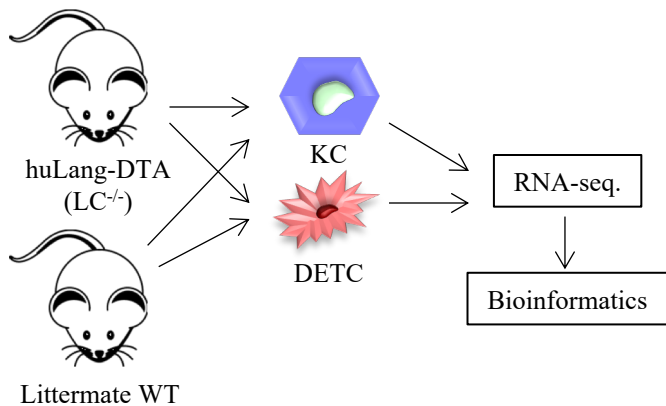

b

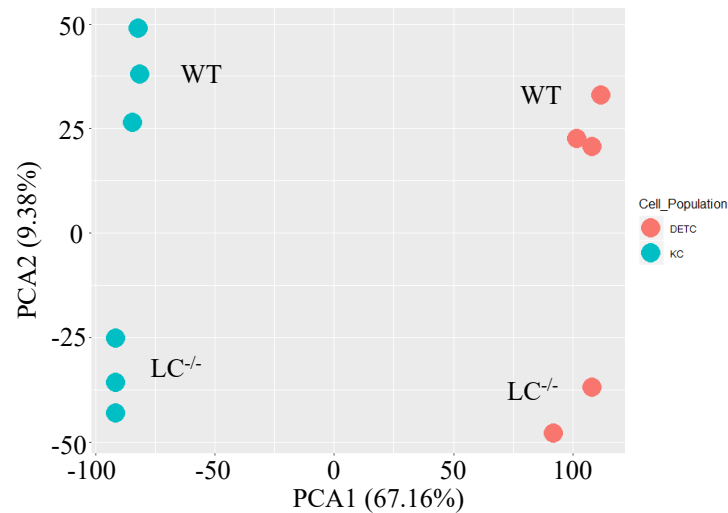

c

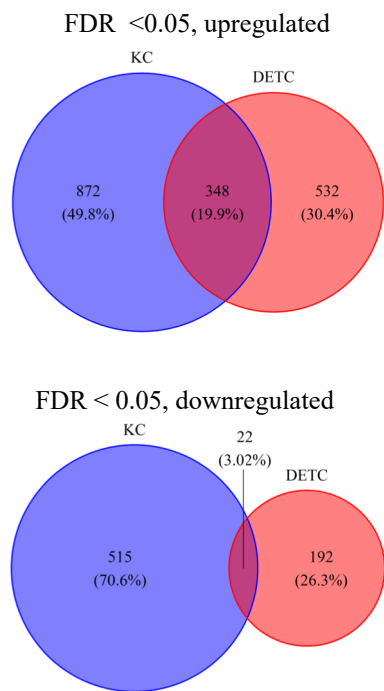

d

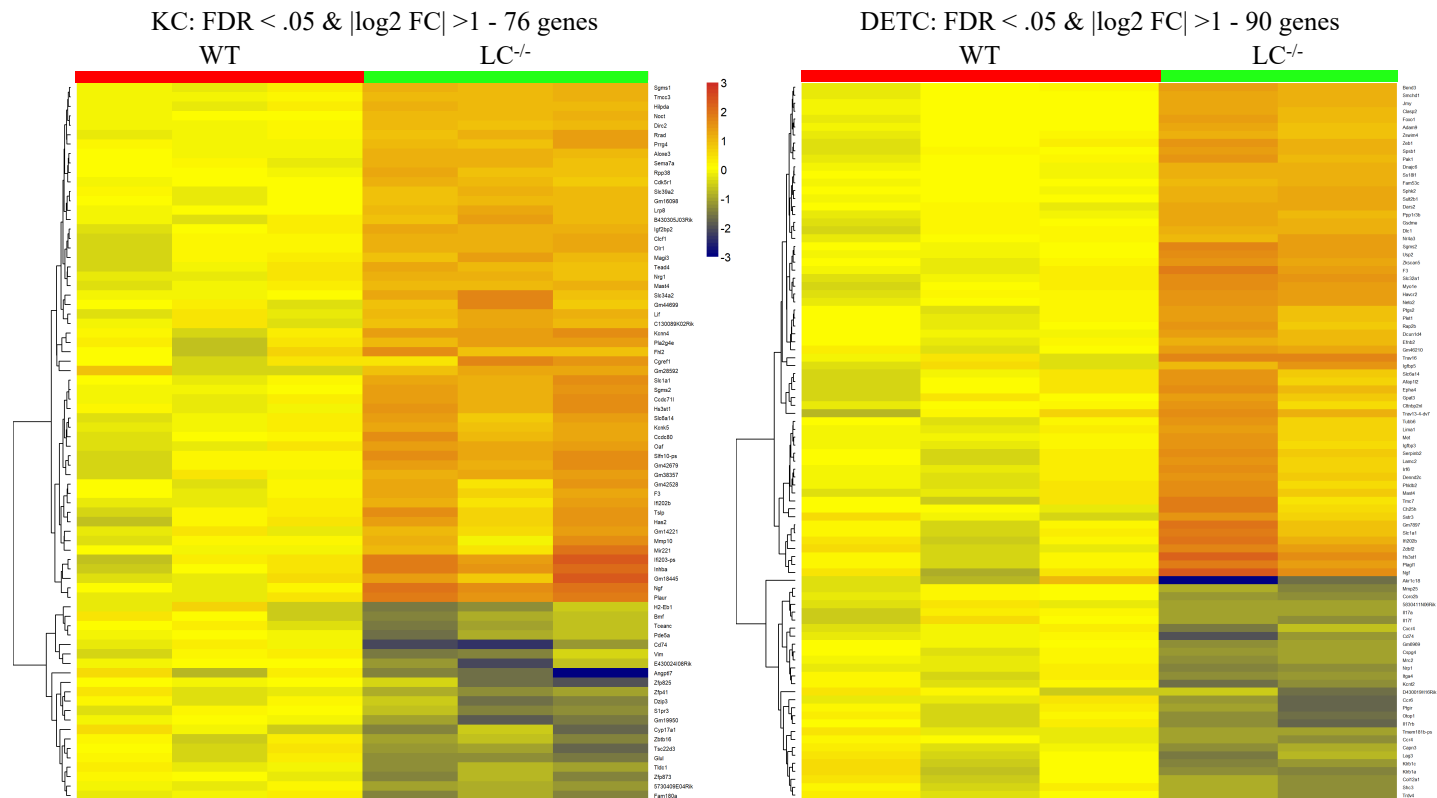

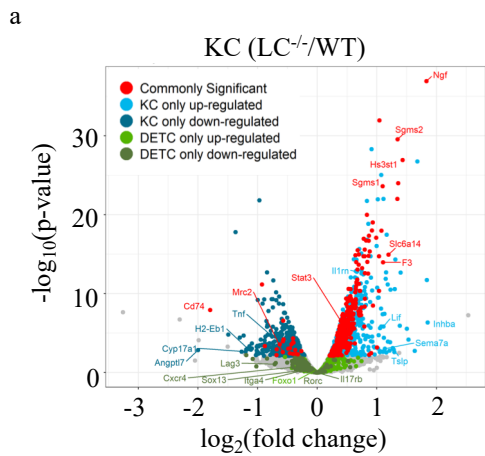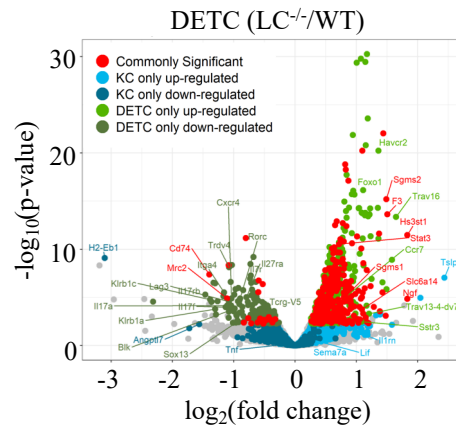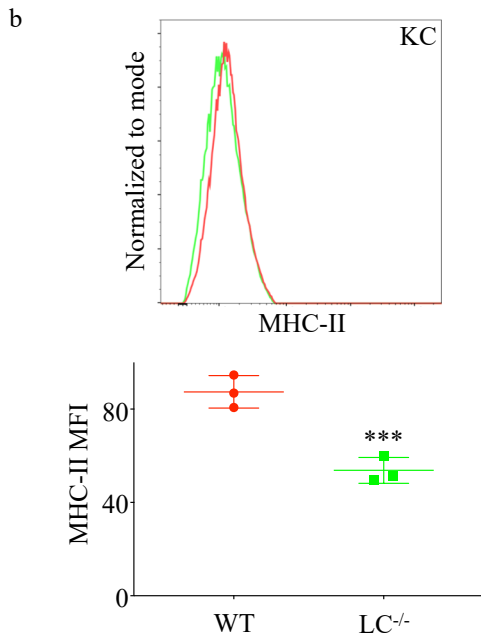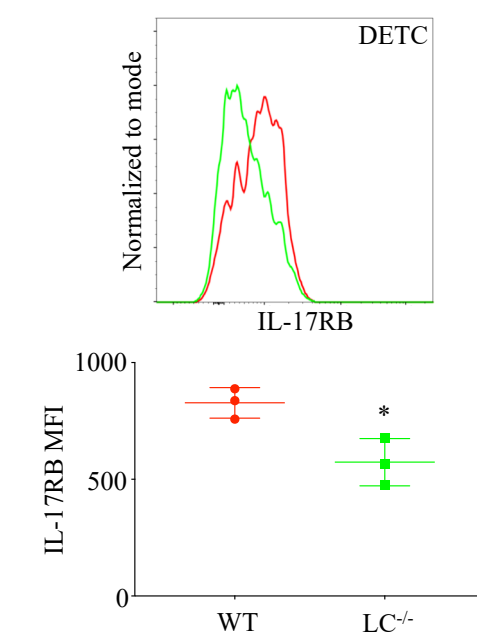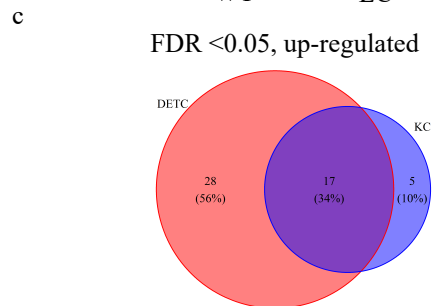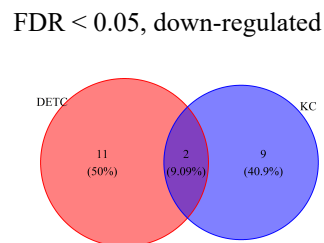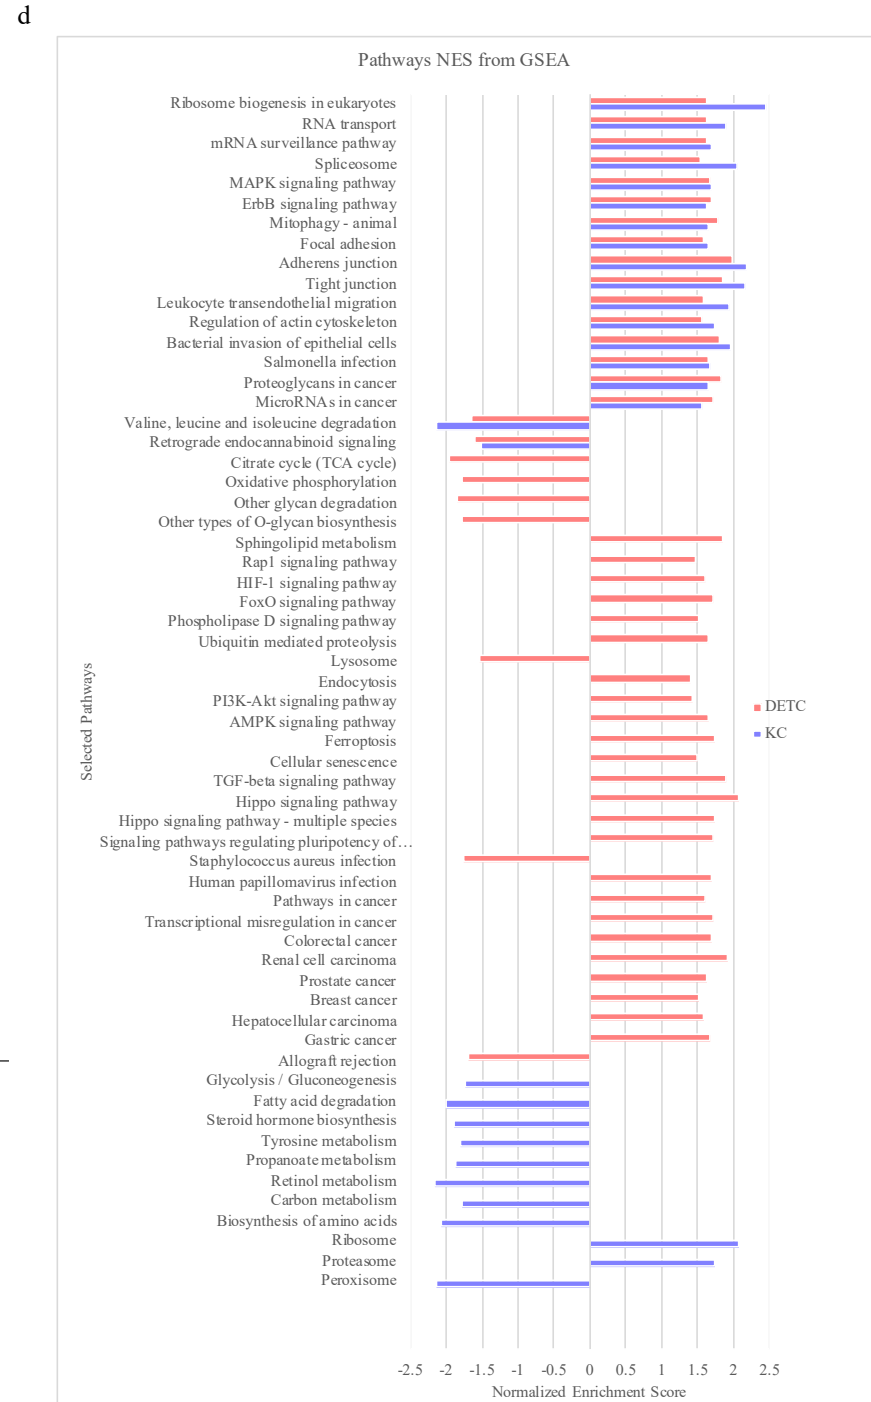

Source: https://www.biorxiv.org/content/10.1101/844530v1.full.pdf
